# Supplementary material for: Transparent photochromic Fe-doped W18O49 films with ultrahigh solar energy modulation for smart windows
Source: Royal Society of Chemistry journal article supplement (doi:10.1039/d4tc05269b), 2025-01-01
Supplement: d4tc05269b1.pdf [file d4tc05269b1.pdf]

## **Transparent photochromic Fe-doped $W_{18}O_{49}$ films with ultrahigh solar energy modulation for smart windows**

Yongkang Zhu<sup>1,a</sup>, Bin Li<sup>1,a,b</sup>, Chenxu Li<sup>a</sup>, Shouqin Tian<sup>a,\*</sup>

*<sup>a</sup> State Key Laboratory of Silicate Materials for Architectures, Wuhan University of Technology, Wuhan 430070, China*

*<sup>b</sup> Department of Electronic Engineering, The Chinese University of Hong Kong, New Territories, Hong Kong SAR, 999077 China*

*\* Corresponding author: Shouqin Tian (E-mail: tiansq@whut.edu.cn)*

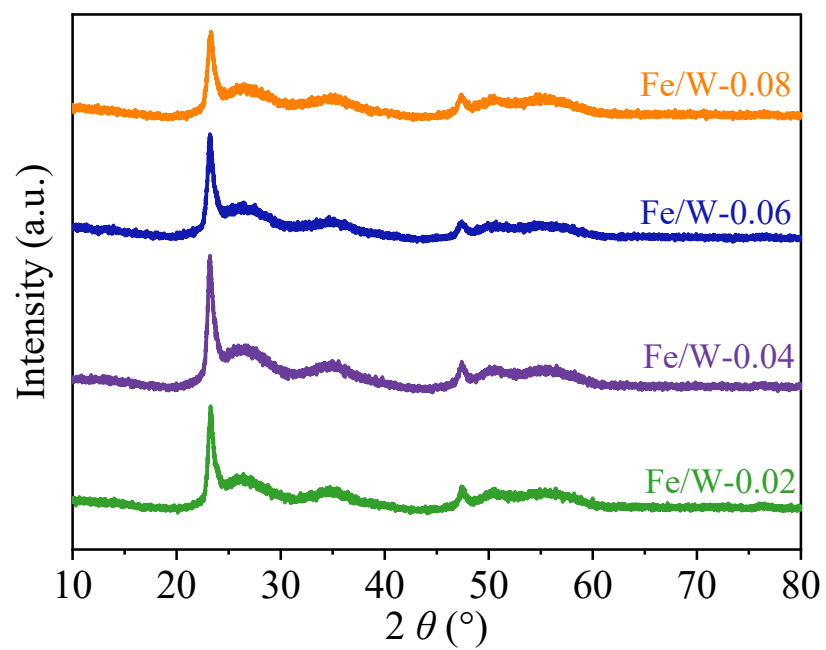

**Fig. S1** XRD patterns of Fe/W-0.02, Fe/W-0.04, Fe/W-0.06 and Fe/W-0.08 nanoparticles.

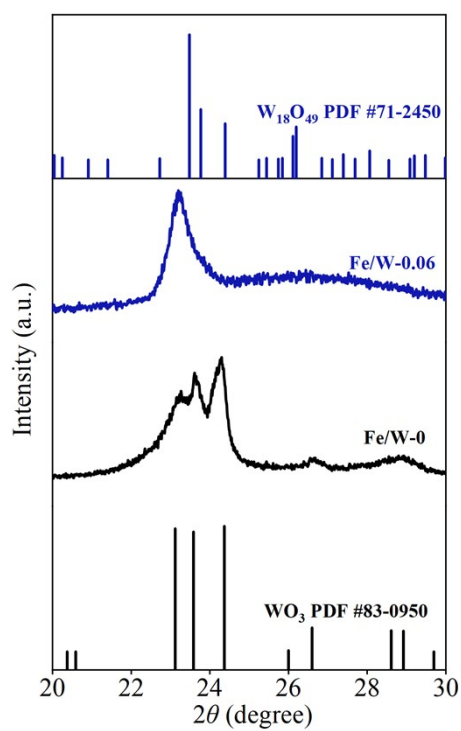

**Fig. S2** XRD patterns of Fe/W-0.06 and Fe/W-0 nanoparticles.

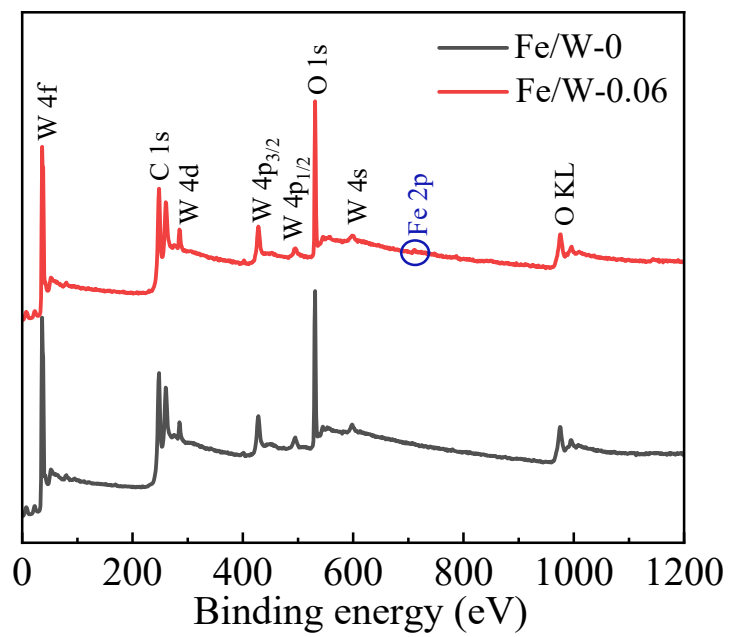

**Fig. S3** Survey XPS spectra of Fe/W-0 and Fe/W-0.06 nanoparticles.

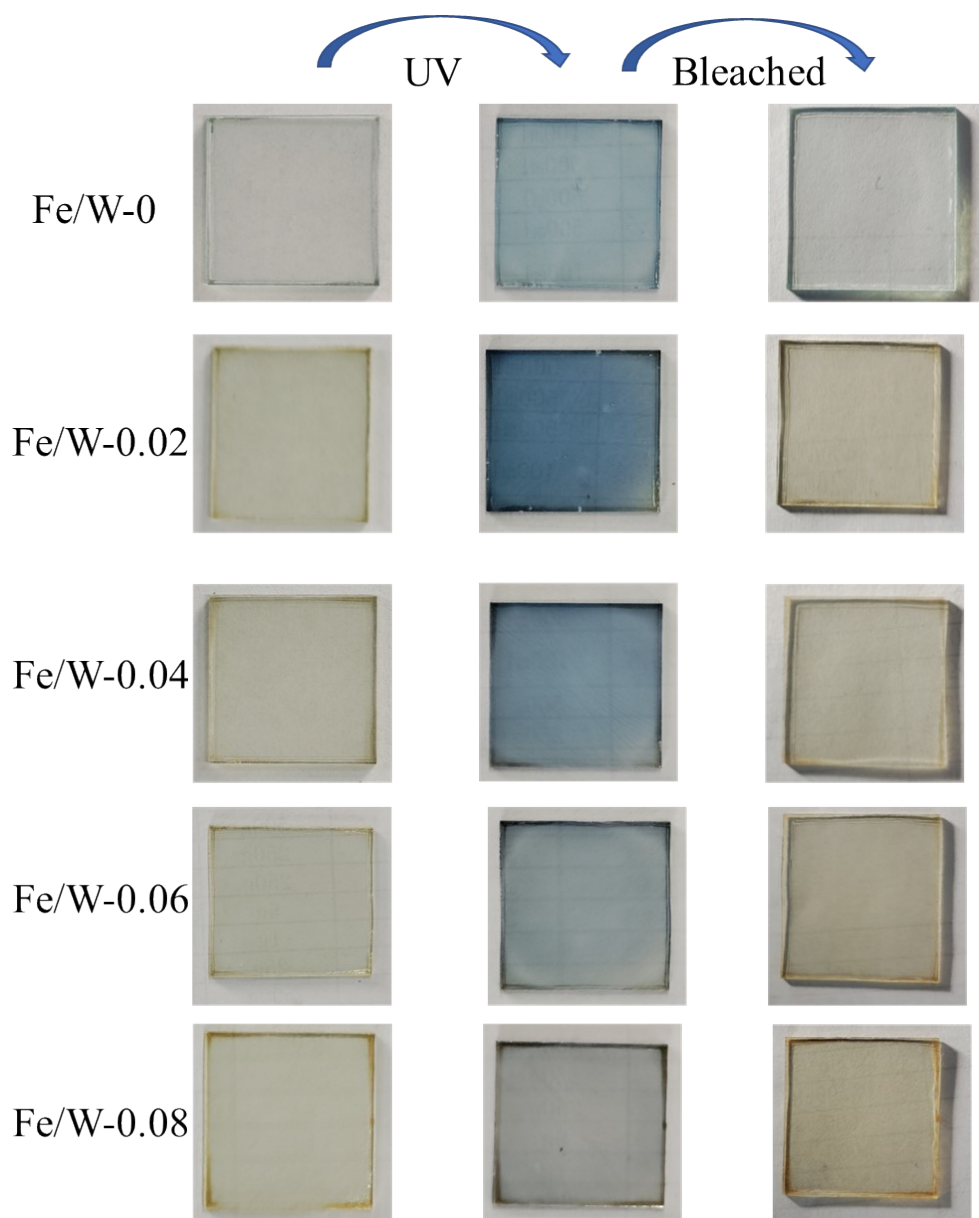

**Fig. S4** The photographs of Fe/W-0~0.08 films from bleached to colored to bleached state.

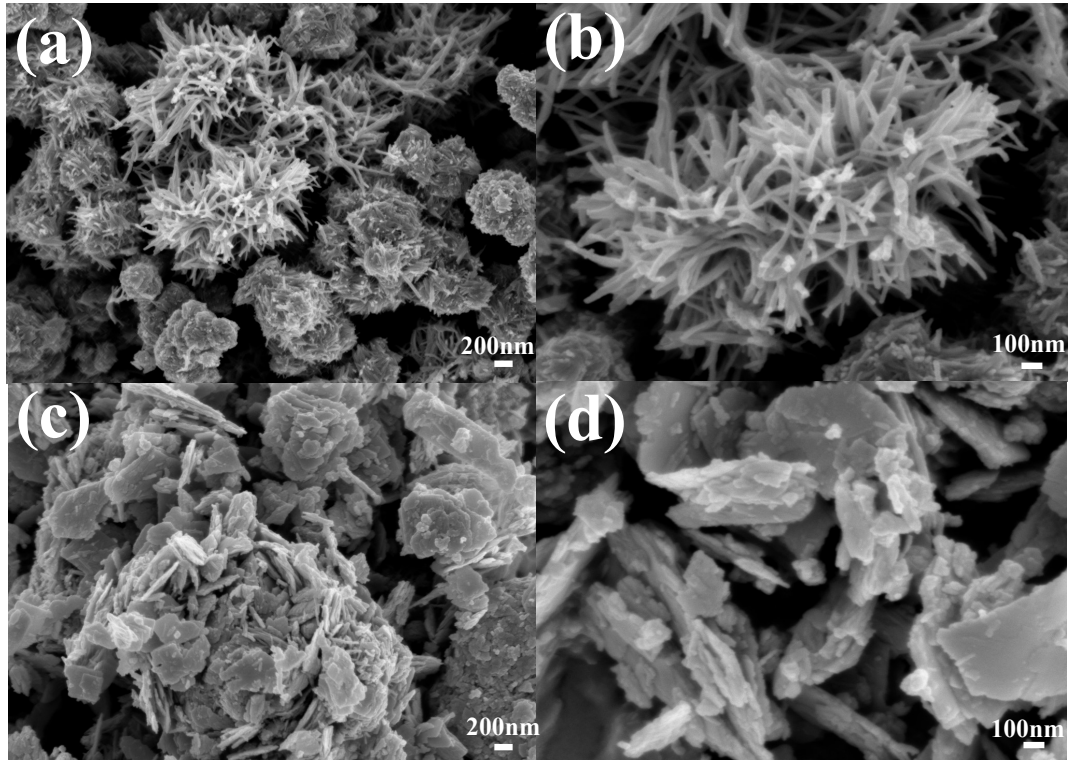

**Fig. S5** SEM image (a) and partial enlargement (b) of Fe/W-0 particles. SEM image (c) and partial enlargement (d) of Fe/W-0.06 particles.

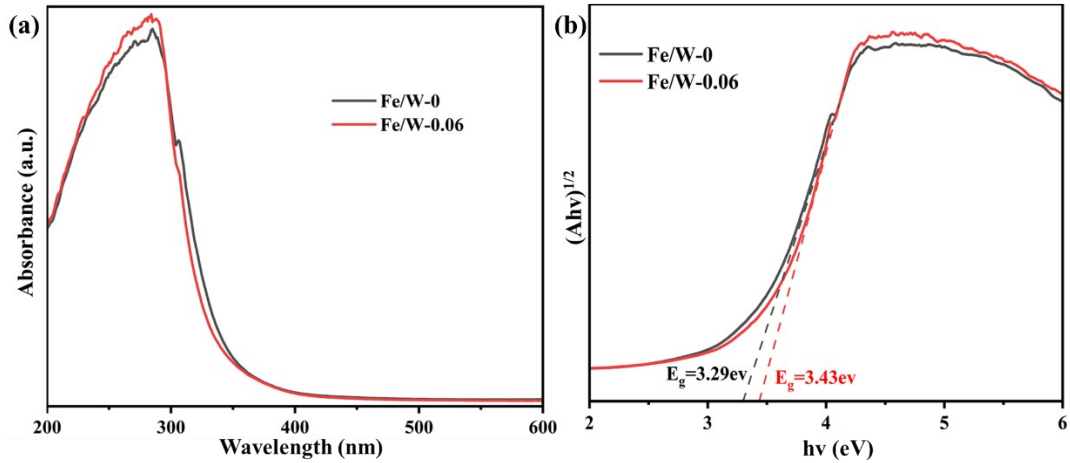

**Fig. S6** (a) UV-Vis absorption spectra of Fe/W-0 and Fe/W-0.06 particles, (b) the corresponding optical band gap. The optical bandgap  $E_g$  was derived from equation  $(\alpha hv)^m = A(hv - E_g)$ , where the exponent  $m$  here was identified as  $1/2$  for indirect-allowed optical transition. By linear fitting the plot of  $(\alpha hv)^{1/2}$  depend on  $hv$ ,  $E_g$  was obtained from the intercept of fitted line with x axis.

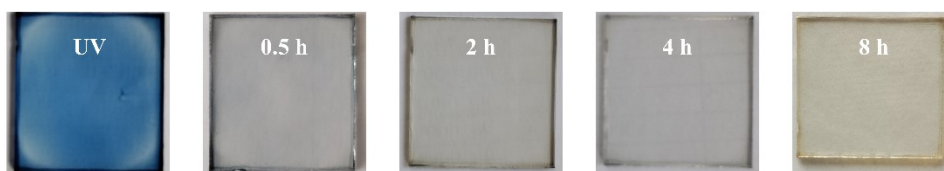

**Fig. S7** Photographs of Fe/W-0.06 bilayer film during the bleaching process at 15 °C in the dark.

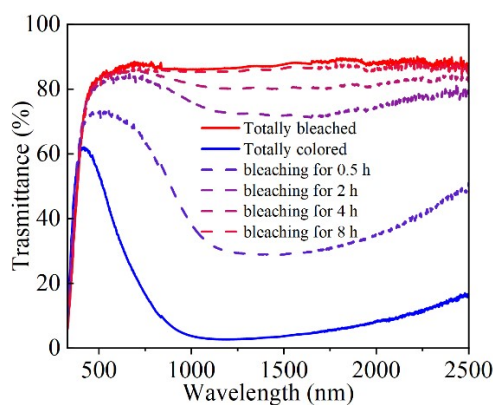

**Fig. S8** Transmittance spectra of Fe/W-0.06 bilayer film during the bleaching process at 15 °C in the dark.

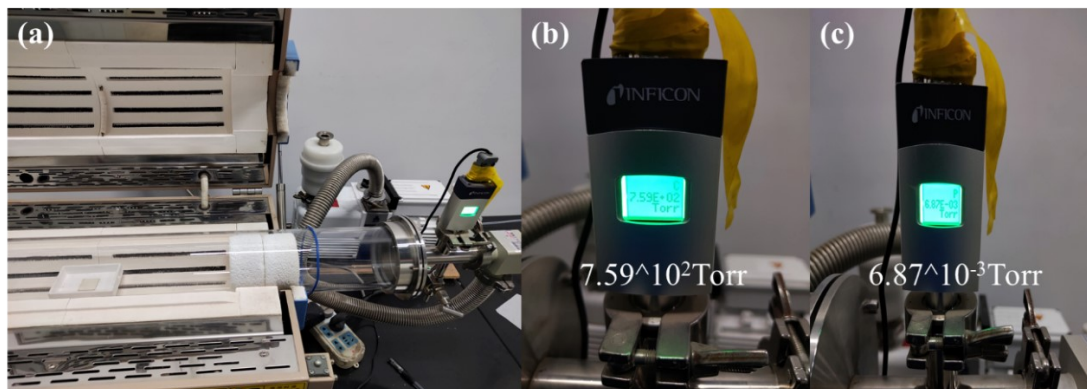

**Fig. S9** (a) Photograph of the experimental set up. The pressure in the tube furnace (b) before and (c) after evacuation (the coloring and bleaching process were taken under this condition).

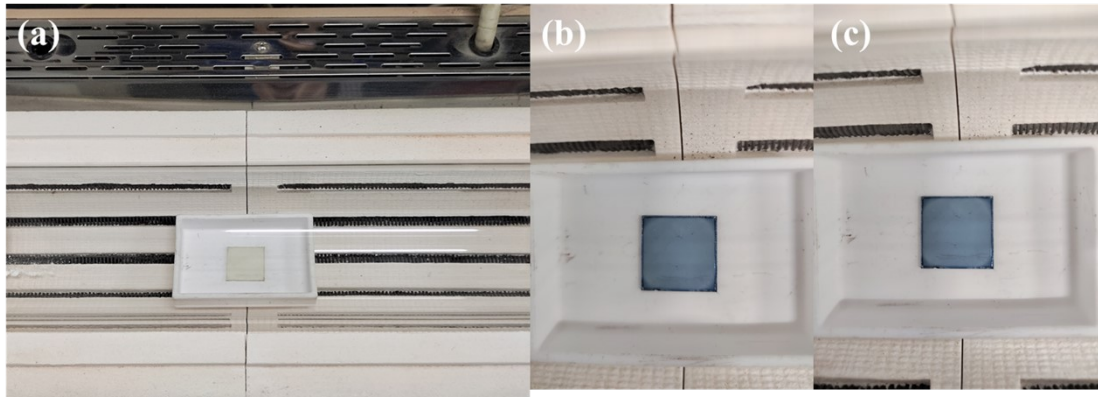

**Fig. S10** Photographs of Fe/W-0.06 bilayer films: (a) totally bleached, (b) totally colored and (c) the colored film after leaving in a vacuum tube furnace at room temperature in the dark for 8 h.

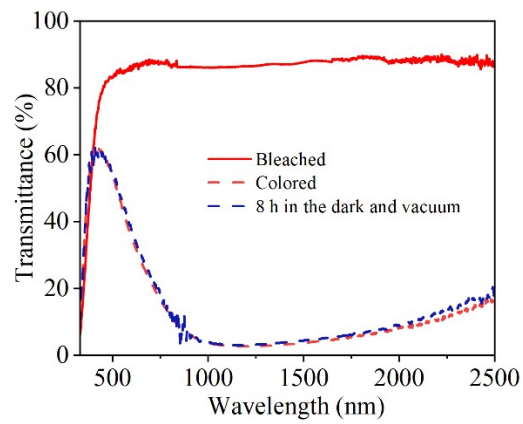

**Fig. S11** Transmittance spectra of Fe/W-0.06 bilayer film in the totally bleached and colored state, and the totally colored film after leaving in a vacuum tube furnace at room temperature in the dark for 8 h.

**Table S1** Optical properties of films with different doping Fe<sup>3+</sup> concentration.

| Fe/W (at.%) | $T_{\text{sol}}$ (%) |               | $T_{\text{lum}}$ (%) |               | $\Delta T_{\text{sol}}$ (%) |
|-------------|----------------------|---------------|----------------------|---------------|-----------------------------|
|             | Bleached state       | Colored state | Bleached state       | Colored state |                             |
| 0           | 83.0                 | 45.5          | 87.3                 | 67.8          | 37.5                        |
| 2           | 84.4                 | 35.6          | 88.0                 | 46.7          | 48.8                        |
| 4           | 85.1                 | 41.1          | 87.5                 | 57.0          | 44.0                        |
| 6           | 84.3                 | 42.6          | 87.2                 | 58.3          | 41.8                        |
| 8           | 84.9                 | 53.6          | 87.2                 | 69.6          | 31.3                        |
| 6 (bilayer) | 79.9                 | 19.7          | 82.9                 | 34.9          | 60.2                        |

**Table S2** The transmittance of films with different doping Fe<sup>3+</sup> concentrations at 1200 nm during the bleaching process.

| Fe/W (at.%) | Transmittance (%) |        |         |         |         |               |
|-------------|-------------------|--------|---------|---------|---------|---------------|
|             | Colored state     | B-5min | B-10min | B-20min | B-30min | Initial state |
| 0           | 17.95             | 42.46  | 50.43   | 62.26   | 67.09   | 81.41         |
| 2           | 20.83             | 48.85  | 60.29   | 67.80   | 71.43   | 82.81         |
| 4           | 20.13             | 66.07  | 74.70   | 79.98   | 80.44   | 85.49         |
| 6           | 21.74             | 75.39  | 81.51   | 84.16   | 84.88   | 85.56         |
| 8           | 30.59             | 82.25  | 83.89   | 84.76   | 84.85   | 86.04         |



**Table S3** Comparison between the Fe/W-0.06 bilayer film and some best reported photochromic materials in terms of photochromic performance.

| Materials                                               | Irradiation conditions | Coloring process | Bleaching process | $\Delta T$        | Ref.      |
|---------------------------------------------------------|------------------------|------------------|-------------------|-------------------|-----------|
| WO <sub>3</sub> /PVA                                    | 365 nm, 8 W            | 5 min            | Air/dark, 3 d     | ~30%              | 1         |
| WO <sub>3-x</sub> /Ta <sub>2</sub> O <sub>5</sub>       | 365 nm, 8 W            | 10 s             | –                 | 28% at 1200 nm    | 2         |
| Zn/W-0.04                                               | 365 nm, 5 W            | <1 min           | –                 | 47.18%            | 3         |
| WO <sub>3</sub> , TiO <sub>2</sub> and SiO <sub>2</sub> | 15 min, sunlight,      | -                | air/dark, ~2 days | 41% ( $T_{vis}$ ) | 4         |
| Cu-WO <sub>3</sub>                                      | 90 min, 365 nm         | -                | air/dark, ~3h     | -                 | 5         |
| Fe/W-0.06                                               | 365 nm, 5 W            | <1 min           | <20 min at 80 °C  | 60%               | This work |

## References

- 1 S. Songara, V. Gupta, M. Kumar Patra, J. Singh, L. Saini, G. Siddaramana Gowd, S. Raj Vadera and N. Kumar, *J. Phys. Chem. Solids*, 2012, **73**, 851–857.
- 2 M. Bourdin, G. Salek, A. Fargues, S. Messaddeq, Y. Messaddeq, T. Cardinal and M. Gaudon, *J. Mater. Chem. C*, 2020, **8**, 9410–9421.
- 3 T. Ma, B. Li, Y. Zhu, S. Wu, X. Zhao, X. Chu and S. Tian, *J. Mater. Chem. C*, 2024, **12**, 10218–10225.
- 4 M. Hočevár and U. Opara Krašovec, *Sol. Energy Mater. Sol. Cells*, 2018, **186**, 111–114.
- 5 Y. Badour, S. Danto, C. Labrugère, M. Duttine and M. Gaudon, *J. Electron. Mater.*, 2022, **51**, 1555–1567.
